# Supplementary material for: Biofilms deform soft surfaces and disrupt epithelia
Source: eLife. 2020 Oct 7;9:e56533. doi: 10.7554/eLife.56533 (PMC7556879; doi:10.7554/eLife.56533)
Supplement: Figure 2—source data 1. [file elife-56533-fig2-data1.xlsx]

## Sheet: Sheet2
Colony name	Colony diameter (µm)	Time (hour)	δmax	λ
'x3'	3.5	0	[]	[]
'x3'	4.2	1	0.58314	14.625
'x3'	5.8	2	0.54033	15.88
'x3'	9.5	3	0.44377	15.9035
'x3'	12.8	4	0.37111	13.6965
'x3'	19.2	5	0.30225	11.2005
'x3'	25	6	0.38237	19.6575
'x3'	30.9	7	[]	[]
'x3'	37.5	8	0.76654	20.3
'x3'	51.3	9	2.11788	18.795
'x3'	63.8	10	3.76759	25.45
'x3'	80.3	11	6.77271	30.352
'x3'	92.2	12	8.62196	35.0555
'x3'	103	13	11.0986	38.1595
'x3'	111.2	14	13.0217	42.2935
'x3'	118.3	15	14.8012	46.288
'x3'	134.6	16	16.4794	51.4
'x3'	144.8	17	17.7311	57.373
'x1'	1.7	0	0.29167	53.404
'x1'	3	1	[]	[]
'x1'	4.8	2	[]	[]
'x1'	6.2	3	[]	[]
'x1'	10	4	[]	[]
'x1'	13	5	0.60891	9.244
'x1'	19.5	6	[]	[]
'x1'	26.4	7	0.49337	17.4515
'x1'	34.3	8	0.58092	13.259
'x1'	42.5	9	1.29445	19.9055
'x1'	53.7	10	2.58055	23.103
'x1'	71.4	11	4.82787	27.761
'x1'	88.5	12	7.56698	31.42
'x1'	99.6	13	9.95193	36.1515
'x1'	110.9	14	13.0327	39.316
'x1'	121.3	15	15.216	42.5245
'x1'	136.2	16	18.3983	49.0525
'x1'	158	17	20.9446	54.038
'x10'	4.1	0	[]	[]
'x10'	5.6	1	[]	[]
'x10'	7.4	2	0.66579	11.4425
'x10'	11.7	3	0.63084	10.6185
'x10'	15	4	[]	[]
'x10'	20.7	5	0.51616	14.041
'x10'	26.4	6	0.43131	12.5685
'x10'	34	7	0.83832	12.508
'x10'	45	8	1.36205	18.079
'x10'	57.2	9	2.58763	22.8365
'x10'	68.7	10	4.8626	28.596
'x10'	88.2	11	7.9162	34.4285
'x10'	99.7	12	10.4625	39.052
'x10'	111.6	13	13.2885	43.333
'x10'	124.9	14	15.9359	46.1045
'x10'	135.1	15	18.0282	49.094
'x10'	153.2	16	20.6242	54.9015
'x10'	175.5	17	23.0338	59.01
'x2'	4.2	0	[]	[]
'x2'	4.6	1	[]	[]
'x2'	9.4	2	0.52947	17.0365
'x2'	10.7	3	[]	[]
'x2'	15.1	4	[]	[]
'x2'	21.6	5	0.72883	13.434
'x2'	31.5	6	0.85916	11.285
'x2'	37.8	7	1.44893	18.3615
'x2'	48.7	8	2.32763	21.4635
'x2'	63.2	9	4.51833	25.4
'x2'	80.3	10	7.39806	30.9715
'x2'	93.9	11	10.1427	36.3795
'x2'	109.8	12	12.7461	41.048
'x2'	123.9	13	15.2136	45.971
'x2'	132.6	14	17.2713	50.0505
'x2'	142.2	15	19.4509	52.6715
'x2'	161.5	16	21.3137	56.5415
'x2'	176.5	17	21.987	61.9315
'x4'	3.4	0	0.44653	11.232
'x4'	4.6	1	[]	[]
'x4'	5.1	2	0.13249	10.217
'x4'	8.4	3	[]	[]
'x4'	12.7	4	0.32512	15.503
'x4'	16.8	5	0.43968	27.731
'x4'	22.7	6	0.48034	24.1625
'x4'	29.6	7	0.69074	22.201
'x4'	37.5	8	1.15921	18.3995
'x4'	51.9	9	2.20995	19.1315
'x4'	64.7	10	3.88968	23.823
'x4'	78.8	11	6.66979	29.701
'x4'	92.3	12	8.80165	34.5855
'x4'	105.4	13	11.5265	39.419
'x4'	113.4	14	14.0154	43.6805
'x4'	126.8	15	16.0235	48.501
'x4'	142.7	16	18.9387	52.551
'x4'	161.9	17	21.8874	58.061
'x9'	4.3	1	0.43323	11.769
'x9'	6.4	2	0.38644	16.696
'x9'	8.6	3	0.38883	10.4005
'x9'	13.8	4	[]	[]
'x9'	18.5	5	[]	[]
'x9'	24.8	6	[]	[]
'x9'	31.3	7	0.33688	13.5235
'x9'	42	8	0.84558	16.634
'x9'	52.9	9	2.03567	19.832
'x9'	66.5	10	4.1652	26.454
'x9'	81.6	11	7.58854	31.568
'x9'	93	12	9.98136	36.099
'x9'	108.3	13	12.4657	41.358
'x9'	116.3	14	15.3	44.9575
'x9'	131.3	15	18.0094	48.2105
'x9'	150.8	16	20.7567	53.835
'x9'	166.7	17	22.6116	57.9965
