# Supplementary material for: Biofilms deform soft surfaces and disrupt epithelia
Source: eLife. 2020 Oct 7;9:e56533. doi: 10.7554/eLife.56533 (PMC7556879; doi:10.7554/eLife.56533)
Supplement: Figure 3—source data 1. [file elife-56533-fig3-data1.xlsx]

## Sheet: Sheet1
PAO1 Rg			PAO1 WT				Vc Rg (A1552)			Vc WT (A1552) M9			N16961 M9			C6706 M9
Diameter (µm)	δmax (µm)		Diameter (µm)	δmax (µm)			Diameter (µm)	δmax (µm)		Diameter (µm)	δmax (µm)		Diameter (µm)	δmax (µm)		Diameter (µm)	δmax (µm)
66.2	9.87222		60.7	3.59378			43.9	1.40413		51.5	3.15046		123	25.7841		141.8	34
67.7	8.64164		65	3.34535			45.1	0.82096		57.7	2.93965		137.2	37.9		91.6	14.0324
69.4	9.67486		65.4	4.5246			48.7	2.14232		64.5	3.21466		144.2	35.9		98.7	15.5407
76.9	13.3834		66.4	2.55477			55.3	2.24651		68	5.80761		146.7	41.0332
77.2	13.3427		67.2	5.38274			56.1	3.12825		73.2	5.77767		155.1	41.8
79.8	14.7293		69.4	4.37524			56.2	1.99215		74.3	7.40008		165.9	48.4
81.5	12.4861		70.1	2.88774			56.9	3.2226		76.3	5.21365		180.9	52.076
83.9	14.2386		70.8	4.893			57.3	2.77083		80.5	8.32674		192.2	57.5
85.6	13.732		72.7	4.508			59.6	3.43029		80.9	6.40928		211	63.3
86.1	16.9841		73.1	5.08363			59.7	2.46567		86.5	4.2123		34	1.63968
88.6	16.0934		73.5	6.44249			60	2.52785		89	6.06498		37.4	1.61693
89.8	[]		75.9	6.17746			61.4	3.32114		91.4	5.80029		45.2	4.29017
89.9	14.8648		76.1	5.73991			108.7	10.9913		92.6	10.0377		45.4	3.28225
92.6	16.335		76.4	5.41007			112.2	13.1687		95.5	4.37445		48.2	4.35609
93	13.3661		76.7	5.7531			115.5	13.7286		98	7.93734		50.3	3.57955
93.3	16.8797		76.9	6.20148			121.5	13.9896		99	13.4249		53.8	2.48826
98.6	20.2708		80.9	6.99741			124.9	14.5249		101.3	10.1554		59.8	7.51567
100.9	13.9396		81.6	4.22721			127.1	14.8758		103.3	5.40516		65.1	9.33047
101.1	16.1004		82.4	5.50704			127.7	15.0196		105	8.59334		65.7	9.82135
101.1	16.3839		84.1	5.99036			129.2	16.133		105.8	6.93227		71.7	11.36
101.4	21.4969		85.8	[]			129.4	16.133		112.8	13.0094		75.7	12.5006
101.4	19.1445		86.7	4.73987			131.7	14.48		118	12.3847		81	13.4898
101.5	19.4811		88.1	6.57672			134.9	16.687		118.2	7.85473		82.7	15.58
101.8	13.934		88.4	6.21253			139.3	17.05		120.1	10.0565		84.3	15.4
102.6	15.0607						159.7	20.6038		121.9	6.55623		87.7	12.4249
102.9	19.0668									123	19.4981		90.5	15.6686
104.4	[]									123.6	6.48361		98.3	18.1789
104.7	23.8335									125.9	18.6057
106.4	19.8011									127.3	9.57107
111.7	20.1668									127.5	17.5858
113.6	20.3502									133.3	9.51713
113.9	29.3336									148.6	14.5457
114.6	19.5458									156.4	2.96296
115.2	19.9835									188.8	12.8228
116.5	28.6008
116.5	22.3668
122.2	20.3511
124.6	27.5002
128.1	21.8168
128.4	24.0169
134.9	29.1502
