# Supplementary material for: Biofilms deform soft surfaces and disrupt epithelia
Source: eLife. 2020 Oct 7;9:e56533. doi: 10.7554/eLife.56533 (PMC7556879; doi:10.7554/eLife.56533)
Supplement: Figure 4—source data 1. [file elife-56533-fig4-data1.xlsx]

## Sheet: Sheet2
PAO1 Rg			ΔcdrA			Δpel			Δpsl
Diameter (µm)	δmax (µm)		Diameter (µm)	δmax (µm)		Diameter (µm)	δmax (µm)		Diameter (µm)	δmax (µm)
66.2	9.87222		61.1	4.38284		55.3	3.05798		56.3	3.5835
67.7	8.64164		62.7	3.24944		56.8	2.20856		56.6	3.14465
69.4	9.67486		64.7	5.96866		57.8	1.62263		72.4	6.23704
76.9	13.3834		70.9	4.54042		58.5	3.9727		74.5	7.69506
77.2	13.3427		71.7	4.49489		58.5	3.45657		75.7	7.85874
79.8	14.7293		75.9	8.10025		59.4	[]		75.8	7.8167
81.5	12.4861		79.8	7.02842		60.5	4.28122		76	7.75187
83.9	14.2386		80.1	7.48672		63.4	3.96378		81.3	8.17176
85.6	13.732		80.9	7.78781		63.8	4.20247		81.6	9.31895
86.1	16.9841		85.2	5.7831		67	2.52672		82.1	9.09717
88.6	16.0934		99.2	9.83267		67.4	4.71443		83.7	8.02047
89.8	[]		101.6	7.7179		69.6	4.69393		85.9	6.18569
89.9	14.8648		113.1	11.0298		69.9	5.98344		86.8	10.1745
92.6	16.335		161.1	9.81857		70.1	3.97881		86.8	10.7361
93	13.3661					73.9	3.43917		87.3	9.36346
93.3	16.8797					79.5	4.76779		89.7	10.2926
98.6	20.2708					79.7	4.73315		90	11.422
100.9	13.9396					80.4	4.72327		90.5	11.49
101.1	16.1004					80.6	7.86969		91	8.55844
101.1	16.3839					82.7	4.86574		92.8	11.0338
101.4	21.4969					82.7	5.4907		96.7	10.9071
101.4	19.1445					83.9	6.13168		98.3	10.7756
101.5	19.4811					86.4	5.36472		103.2	12.2896
101.8	13.934					86.8	7.12967		103.4	11.1787
102.6	15.0607					89.4	7.15645		108.9	15.5872
102.9	19.0668					93.9	5.58593		112.5	13.4266
104.4	[]					96.1	7.34573		112.7	14.0358
104.7	23.8335					101.4	5.81359		114.9	12.3608
106.4	19.8011					104.6	4.43453		117	17.5234
111.7	20.1668					117.6	6.46003		133.2	21.1076
113.6	20.3502					132.4	[]		136.9	22.0882
113.9	29.3336					157	6.33711
114.6	19.5458
115.2	19.9835
116.5	28.6008
116.5	22.3668
122.2	20.3511
124.6	27.5002
128.1	21.8168
128.4	24.0169
134.9	29.1502
