# Supplementary material for: Biofilms deform soft surfaces and disrupt epithelia
Source: eLife. 2020 Oct 7;9:e56533. doi: 10.7554/eLife.56533 (PMC7556879; doi:10.7554/eLife.56533)
Supplement: Figure 5—source data 1. [file elife-56533-fig5-data1.xlsx]

## Sheet: Sheet1
E = 12 kPa				E = 31 kPa				E = 38 kPa				E = 203 kPa
Diameter (µm)	δmax (µm)	λ (µm)		Diameter (µm)	δmax (µm)	λ (µm)		Diameter (µm)	δmax (µm)	λ (µm)		Diameter (µm)	δmax (µm)	λ (µm)
34.2	2.63425	17.7065		33.2	1.01634	15.7345		43.9	1.40413	17.291		46.4	1.08	[]
35.8	1.706	18.3085		35.4	0.58764	24.0885		45.1	0.82096	19.0865		54.1	1.00899	[]
52.5	4.91477	23.9205		65.7	4.95144	27.9025		48.7	2.14232	22.978		57.5	0.78385	[]
57.2	5.14143	25.3655		66.2	4.61777	24.555		55.3	2.24651	22.6875		57.5	0.92392	[]
60.5	5.89616	20.3965		66.6	4.94288	23.967		56.1	3.12825	28.047		61	1.1193	[]
62.8	6.31684	26.3365		71.4	4.90949	25.7475		56.2	1.99215	22.7885		76.6	1.76545	27.3815
62.9	6.82884	24.1715		73.4	6.13115	28.165		56.9	3.2226	20.8675		109.8	3.47361	46.207
66.5	7.31561	27.258		78.7	5.31978	29.423		57.3	2.77083	26.442		112.8	4.21809	39.825
67.3	7.65258	29.8555		80.7	8.24086	32.793		59.6	3.43029	25.31		119.2	4.48863	42.0075
67.5	7.2629	30.834		82.3	7.57747	30.778		59.7	2.46567	24.1265		122.4	3.92387	44.894
69.6	8.32368	30.884		83.8	6.69667	33.629		60	2.52785	27.856		124.9	5.11486	45.1135
70.6	9.91125	30.7765		86.6	7.84292	30.98		61.4	3.32114	22.968		126.7	4.8006	46.837
70.8	9.42084	29.5345		86.6	7.74132	32.0825		108.7	10.9913	40.484		130.9	5.26707	45.299
71.2	8.66085	27.7305		87.2	8.11598	30.138		112.2	13.1687	40.72		185.6	7.53903	92.8995
93.9	19.258	31.169		93.6	11.9117	36.6315		115.5	13.7286	44.406		190.1	7.80644	84.3295
94.7	19.07	37.034		121.3	17.2501	46.604		121.5	13.9896	43.0385		191.7	7.17187	78.6575
96.5	21.084	36.117		128.4	16.684	46.384		124.9	14.5249	48.232		195.6	7.39487	82.051
114.6	28.969	45.1		134.4	16.8445	52.6805		127.1	14.8758	43.757		196	6.97992	84.982
116.4	26.772	50.967		135.3	18.517	47.85		127.7	15.0196	48.7745		199.4	8.04606	86.998
130.1	33.734	52.25		135.9	18.886	50.3235		129.2	16.133	47.3		222.5	6.28149	89.4825
136.2	34.835	57.388		140.6	20.0948	54.504		129.4	16.133	46.017
138.2	35.571	56.833		148.4	21.634	54.085		131.7	14.48	46.567
140.9	36.484	56.1		148.6	21.267	59.4		134.9	16.687	45.65
141.1	37.217	56.834		148.8	18.7256	57.6085		139.3	17.05	47.3
142.4	37.952	57.934		149	17.5975	56.036		159.7	20.6038	59.194
143.5	36.85	56.467		150.5	19.6382	57.938
143.7	39.233	57.751		194.1	24.8088	73.0995
148.5	41.617	64.168		228.8	24.3154	88.931
149.1	43.267	56.65
174.1	55.374	67.467
177.4	57.385	63.556
187.9	61.967	72.051
198.8	66.184	76.512
203.1	55.734	69.178
203.5	64.778	73.822
203.6	62.823	78.467
214.6	73.822	83.111
227.3	76.267	98.269
243.9	55.733	76.032
